# Supplementary material for: RNA-Binding Protein La Mediates TGFβ-Induced Epithelial to Mesenchymal Transition and Cancer Stem Cell Properties
Source: PubMed Central journal article supplement (PMC7832410; doi:10.3390/cancers13020343), 2021-01-19
Supplement: cancers-13-00343-s001.pdf [file cancers-13-00343-s001.pdf]

# Supplementary Materials: RNA-Binding Protein La Mediates TGF $\beta$ -Induced Epithelial to Mesenchymal Transition and Cancer Stem Cell Properties

Tilman Heise and Gunhild Sommer

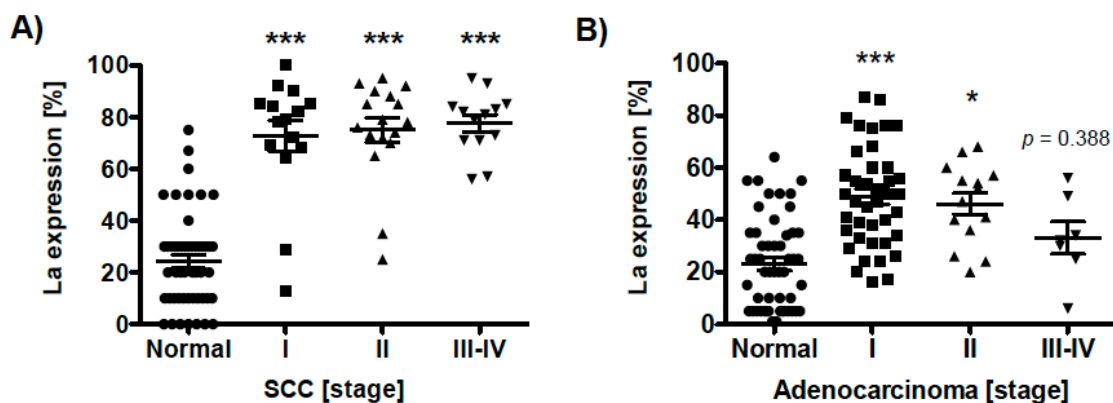

**Figure S1.** Overexpression of RBP La in lung cancer tissue analyzed by cancer stage. (A) SCC (B) adenocarcinoma ( $p$ -value  $< 0.05$  (one asterisk),  $< 0.001$  (three asterisks)).

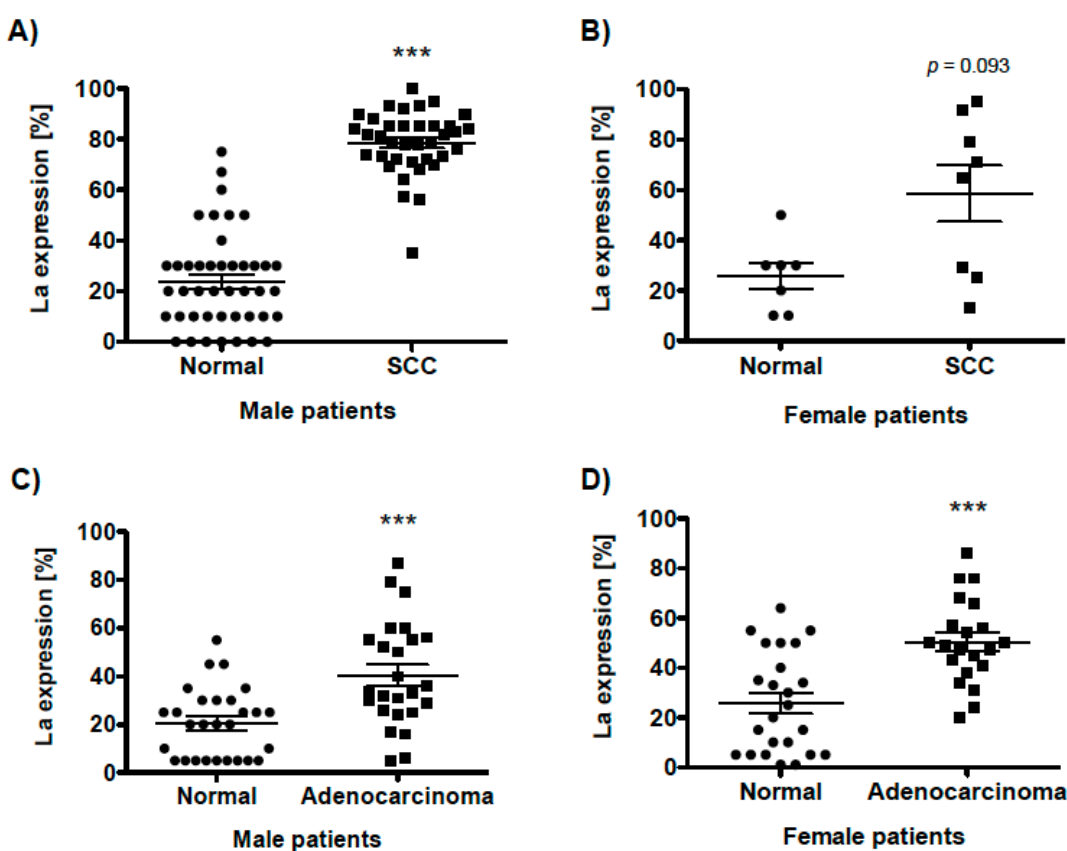

**Figure S2.** Overexpression of RBP La in lung cancer tissue analyzed regarding sex differences: (A) SCC, male, (B) SCC, female, (C) adenocarcinoma, male, (D) adenocarcinoma, female ( $p$ -value  $< 0.001$  (three asterisks)).

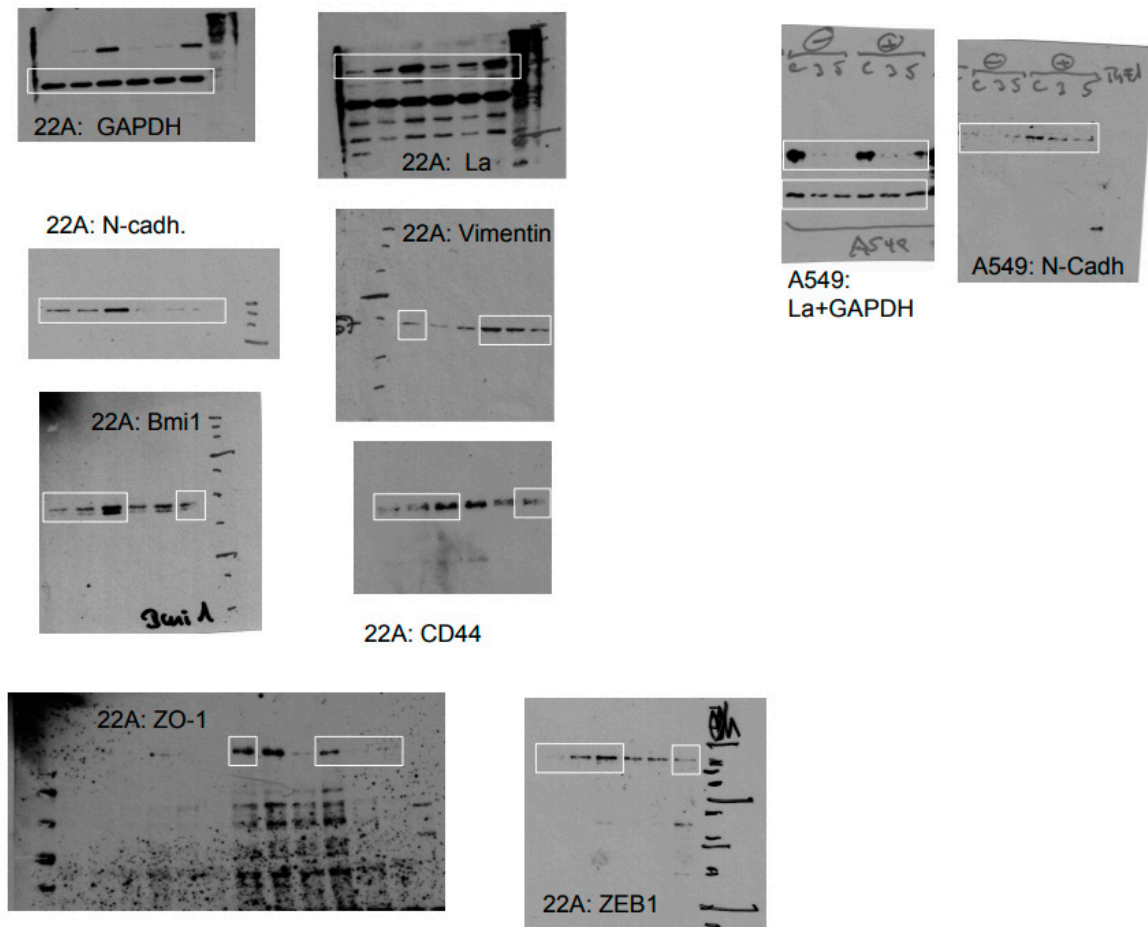

Figure S3. Supplemental Figure 4 and Figure 5.

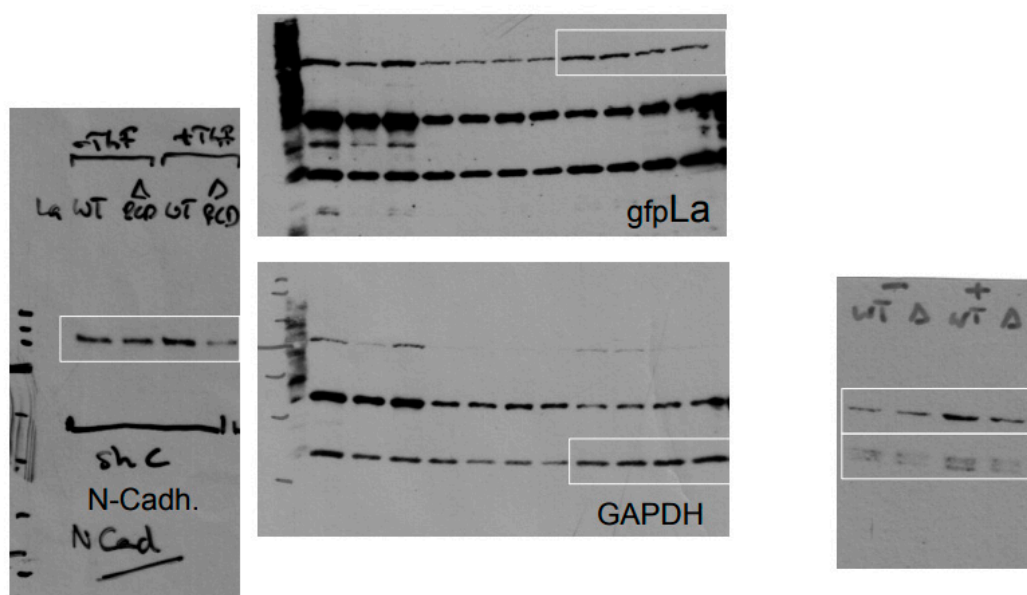

Figure S4. Supplemental Figure 6.

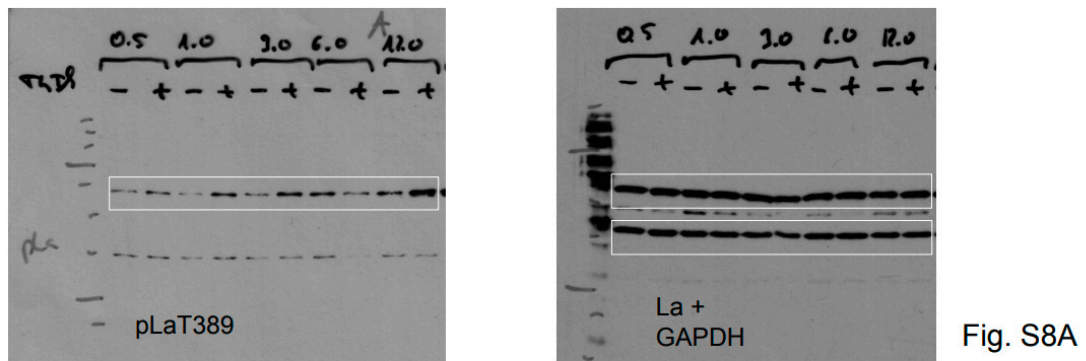

Fig. S8A

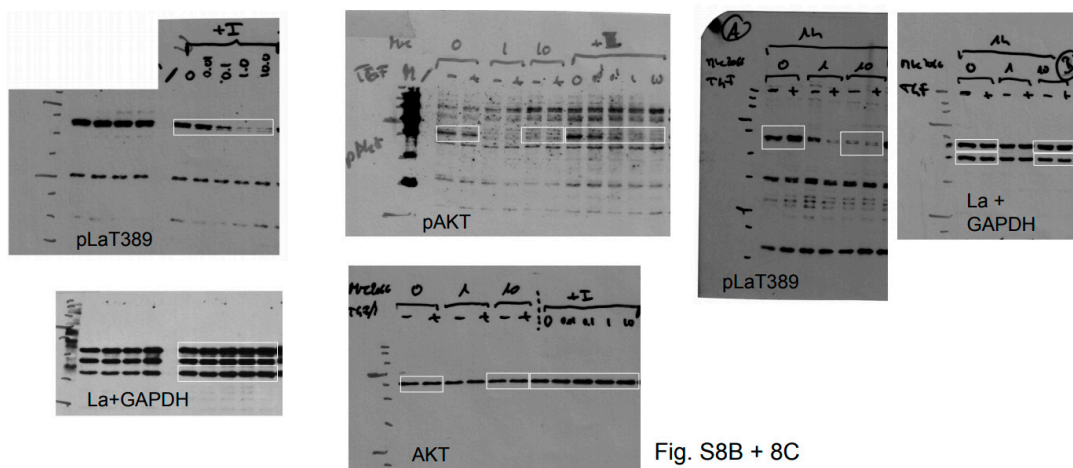

Fig. S8B + 8C

Figure S5. Supplemental Figure 8.

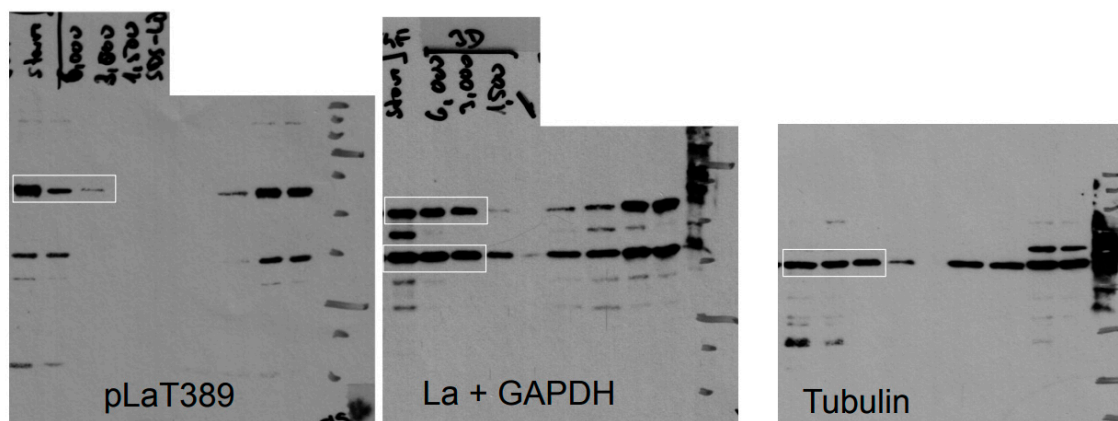

Figure S6. Supplemental Figure 9.
